# Supplementary material for: DNA Nanostructure-based Interfacial engineering for PCR-free ultrasensitive electrochemical analysis of microRNA
Source: PubMed Central journal article supplement — Sci Rep. 2012 Nov 16;2:867. doi: 10.1038/srep00867 (PMC3499757; doi:10.1038/srep00867), 2012-11-16
Supplement: srep00867-s1.pdf [file srep00867-s1.pdf]

## Supplementary Information

### DNA Nanostructure-based Interfacial engineering for PCR-free ultrasensitive electrochemical analysis of microRNA

*Yanli Wen,<sup>1</sup> Hao Pei,<sup>1</sup> Ye Shen,<sup>2</sup> Junjie Xi,<sup>3</sup> Meihua Lin,<sup>1</sup> Na Lu,<sup>1</sup> Xizhong Shen,<sup>3</sup>*

*Jiong Li,<sup>2</sup> Chunhai Fan\*<sup>1</sup>*

<sup>1</sup>Laboratory of Physical Biology, Shanghai Institute of Applied Physics, Chinese Academy of Sciences, Shanghai 201800; <sup>2</sup>Suzhou Institute of Nano-tech and Nano-bionics, Chinese Academy of Sciences, Suzhou 215123; <sup>3</sup> Zhongshan Hospital, Fudan University, Shanghai 200032, China

**Table S1.** Synthetic Oligonucleotide Probes

| Probe Name   | Sequence (5'-3')                                                                |
|--------------|---------------------------------------------------------------------------------|
| Tetra-miR-21 | ACATTCCTAAGTCTGAAACATTACAGCTTGCTACACGAGAAGAGCCGCCATAGTAAAA<br>AAAAAAATCAACATCAG |
| Tetra-let-7d | ACATTCCTAAGTCTGAAACATTACAGCTTGCTACACGAGAAGAGCCGCCATAGTAAAA<br>AAAAAAAAACTATGCAA |
| Tetra-miR-31 | CATCTTGCCTAAAAAAAAAACATTCCTAAGTCTGAAACATTACAGCTTGCTACACGAG<br>AAGAGCCGCCATAGTA  |
| Tetra-B      | SH-C <sub>6</sub> -TATCACCAGGCAGTTGACAGTGTAGCAAGCTGTAATAGATGCGAGGGTCCAATAC      |
| Tetra-C      | SH-C <sub>6</sub> -TCAACTGCCTGGTGATAAACGACACTACGTGGGAATCTACTATGGCGGCTCTTC       |
| Tetra-D      | SH-C <sub>6</sub> -TTCAGACTTAGGAATGTGCTTCCCACGTAGTGTGCTTTGTATTGGACCTCGCAT       |
| swRP-miR-21  | TCTGATAAGCTA-BIOTIN'                                                            |
| swRP-let-7d  | CCTACTACCTCT-BIOTIN'                                                            |
| swRP-miR-31  | BIOTIN'-AGCTATGCCAG                                                             |
| SH-ss-miR-21 | SH-C <sub>6</sub> -TAAATAAATATCAACATCAG                                         |
| miD-21       | TAGCTTATCAGACTGATGTTGA                                                          |

**Table S2. Sequences of mature human miRNAs**

| miRBase ID  | Sequence (5'-3')       | Accession#   |
|-------------|------------------------|--------------|
| hsa-mirR-21 | UAGCUUAUCAGACUGAUGUUGA | MIMAT0000076 |
| hsa-miR-31  | AGGCAAGAUGCUGGCAUAGCU  | MIMAT0000089 |
| hsa-let-7a  | UGAGGUAGUAGGUUGUAUAGUU | MIMAT0000062 |
| hsa-let-7b  | UGAGGUAGUAGGUUGUGUGGUU | MIMAT0000063 |
| hsa-let-7c  | UGAGGUAGUAGGUUGUAUGGUU | MIMAT0000064 |
| hsa-let-7d  | AGAGGUAGUAGGUUGCAUAGUU | MIMAT0000065 |
| hsa-let-7e  | UGAGGUAGGAGGUUGUAUAGUU | MIMAT0000066 |
| hsa-let-7f  | UGAGGUAGUAGAUUGUAUAGUU | MIMAT0000067 |
| hsa-let-7g  | UGAGGUAGUAGUUUGUACAGUU | MIMAT0000414 |
| hsa-let-7i  | UGAGGUAGUAGUUUGUGCUGUU | MIMAT0000415 |
| hsa-miR-98  | UGAGGUAGUAAGUUGUAUUGUU | MIMAT0000096 |

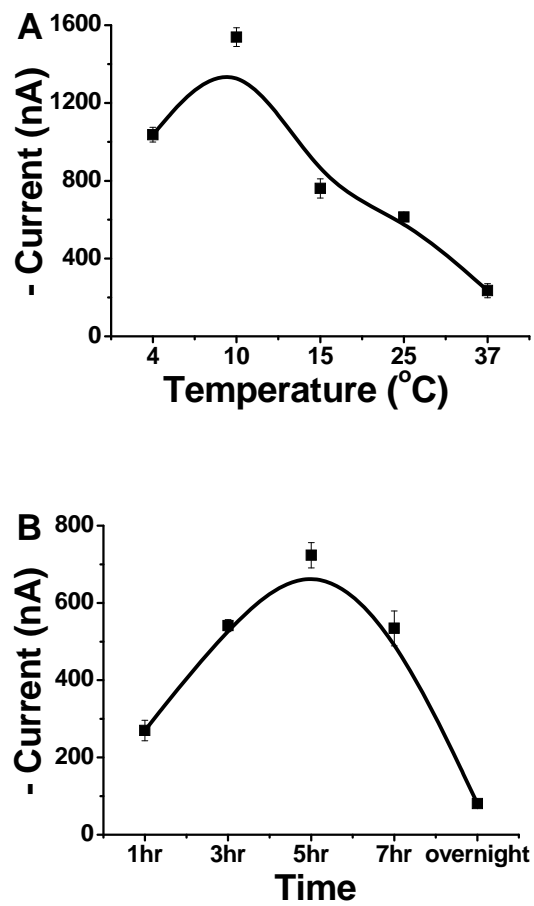

**Figure S1.** Effect of (A) hybridization temperature (of 1 nM miR-21 in 5hr hybridization) and (B) hybridization time (of 10 pM miR-21 hybridization at 10 °C) for tetrahedra-based EMRS. Error bars represent standard deviations for measurements taken from at least three independent experiments.

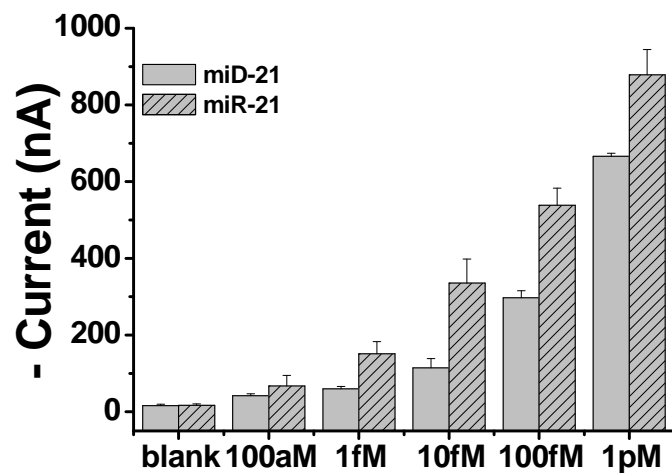

**Figure S2.** Comparison for detection of DNA and RNA with tetrahedra-based EMRS.

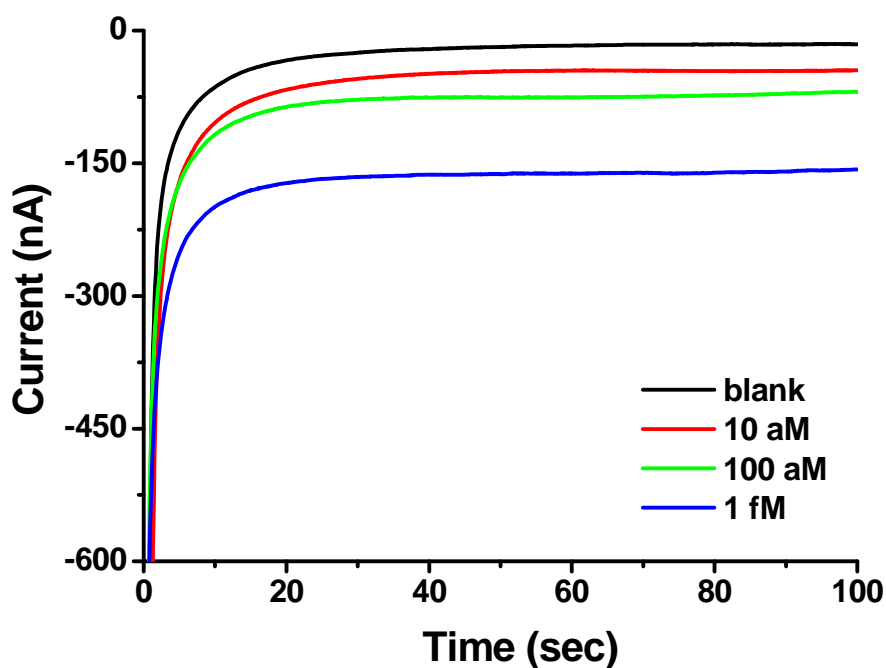

**Figure S3.** Amperometric curves (i-t) for EMRS with poly-HRP80 tested with miR-21 of ultralow concentrations (10 aM, 100 aM, 1 fM) and the blank solution. The data are shown in the inset of Fig. 4A.
